# Supplementary material for: Prediction of Cardiovascular Risk Using Nonalcoholic Fatty Liver Disease Scoring Systems
Source: MDPI journal article supplement (doi:10.3390/healthcare9070899), 2021-07-15
Supplement: s1 [file s1]

## Simple NAFLD score (SNS) and comprehensive NAFLD score (CNS)

**Supplementary Table S1. Simple NAFLD score.**

| Questions                                    | Score |        |
|----------------------------------------------|-------|--------|
|                                              | Male  | Female |
| Age (yrs)                                    |       |        |
| <35                                          | 0     |        |
| ≥35                                          | 2     |        |
| Waist circumference (cm)                     |       |        |
| <80 (M), < 75 (F)                            | 0     | 0      |
| 80-89.9 (M), 75-84.9 (F)                     | 2     | 1      |
| 90-99.9 (M), 85-94.9 (F)                     | 3     | 2      |
| ≥ 100 (M), ≥ 95 (F)                          | 4     | 3      |
| Body mass index (kg/m <sup>2</sup> )         |       |        |
| <23                                          | 0     |        |
| 23-24.9                                      | 1     |        |
| 25-26.9                                      | 2     |        |
| ≥27                                          | 3     |        |
| Diabetes                                     | 2     |        |
| Dyslipidemia                                 | 2     |        |
| No regular exercise<br>(physically inactive) | 1     |        |
| Alcohol<br>consumption(Men)                  | 1     | 0      |
| Menopause(Women)                             | 0     | 1      |
| Total score                                  |       |        |

**Supplementary Table S2. Comprehensive NAFLD score.**

|                                                                                                                                                                                                                                                                                                                                                                                                 |
|-------------------------------------------------------------------------------------------------------------------------------------------------------------------------------------------------------------------------------------------------------------------------------------------------------------------------------------------------------------------------------------------------|
| NAFLD = $1 / (1 + \exp(-x)) \times 100$                                                                                                                                                                                                                                                                                                                                                         |
| if male,<br>$x = 0.016 \times \text{age} + 0.182 \times \text{BMI} + 0.089 \times \text{WC} + 0.391 \times \text{alcohol} + 0.124 \times \text{exercise} + 0.018 \times \text{fasting glucose} + 0.773 \times \log_e(\text{triglycerides}) - 0.014 \times \text{HDL cholesterol} + 0.145 \times \text{uric acid} - 0.674 \times \log_e(\text{AST}) + 1.632 \times \log_e(\text{ALT}) - 21.695.$ |
| if female,<br>$x = 0.320 \times \text{BMI} + 0.044 \times \text{WC} + 0.533 \times \text{diabetes} + 0.016 \times \text{fasting glucose} + 0.951 \times \log_e(\text{triglycerides}) - 0.015 \times \text{HDL cholesterol} + 0.199 \times \text{uric acid} - 0.645 \times \log_e(\text{AST}) + 1.302 \times \log_e(\text{ALT}) + 0.255 \times \text{menopause} - 19.741.$                       |
